# Supplementary material
Source: MDPI journal article supplement (https://www.mdpi.com/2227-9717/11/5/1427)
Supplement: s1 [file s1 › processes-2361412-supplementary.pdf]

# Activation Energy of Ion Diffusion in an Electrode Material: Theoretical Calculation and Experimental Estimation with $\text{LiCoVO}_4$ as an Example

Kirill S. Rybakov <sup>1\*</sup>, Arseni V. Ushakov <sup>1\*</sup> and Artem A. Kabanov <sup>2,3</sup>

<sup>1</sup> Physical Chemistry Department, Institute of Chemistry, Saratov State University, Saratov 410012, Russia

<sup>2</sup> General and Inorganic Chemistry Department, Samara State Technical University, Samara 443100, Russia

<sup>3</sup> Samara Branch of P. N. Lebedev Physical Institute of the Russian Academy of Sciences, Samara 443011, Russia

\* Correspondence: rybakov-ks@ya.ru (K.S.R.); arsenivushakov@ya.ru (A.V.U.)

## Supplementary Materials

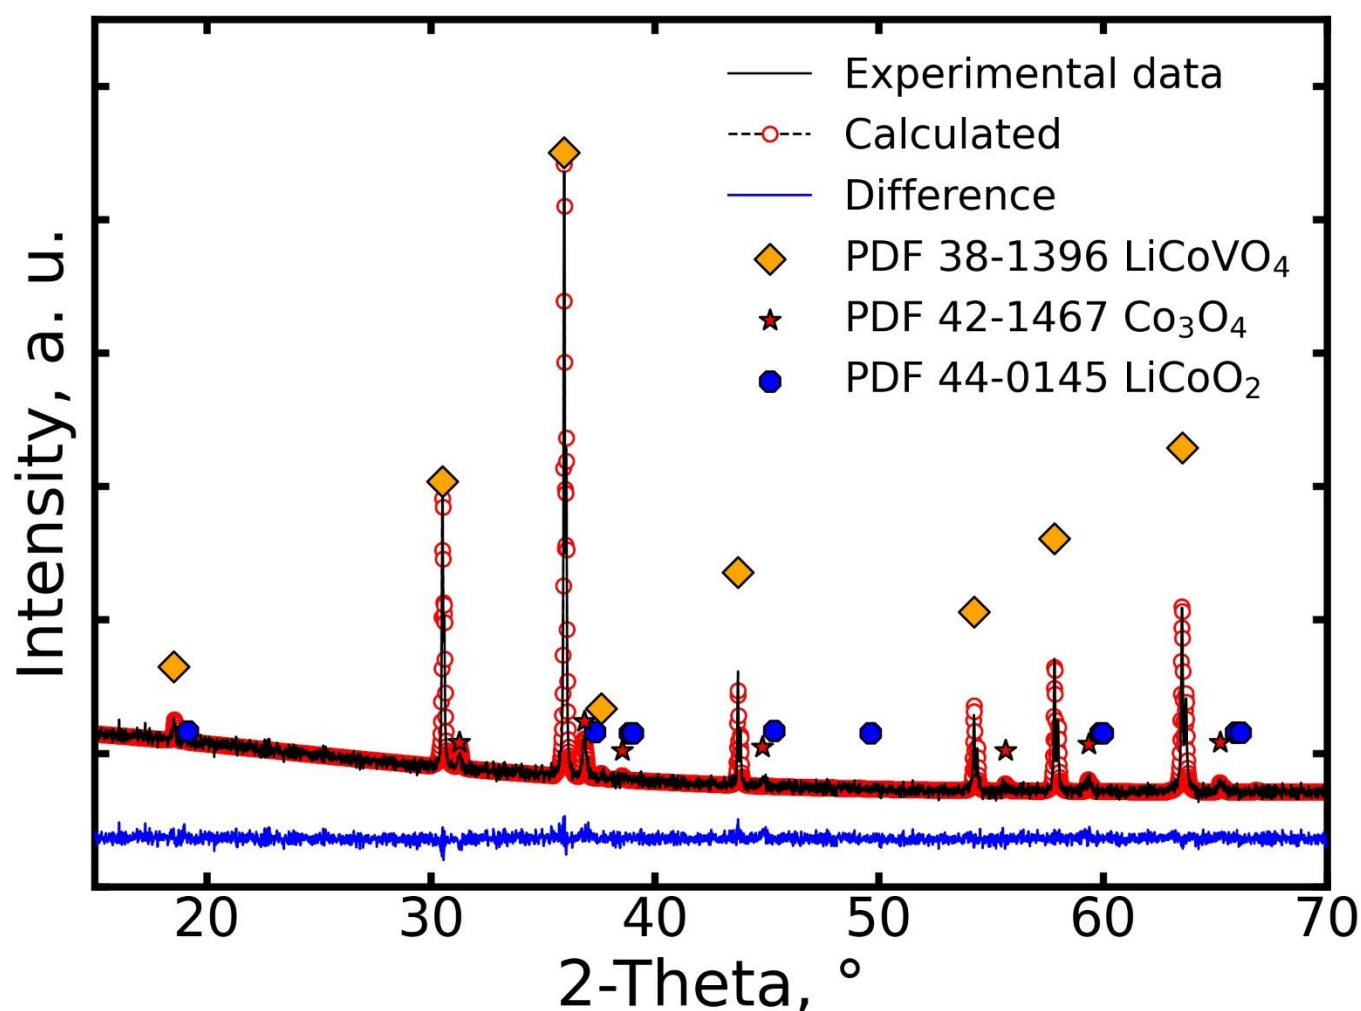

**Figure S1.** X-ray powder diffraction pattern of a  $\text{LiCoVO}_4$  sample and illustration of the analysis result by the Rietveld technique \*.

\* We varied the parameters such as the coefficients of a polynomial for the background, the zero offset of the goniometer, the scale factor and unit cell parameters for  $\text{LiCoVO}_4$  and  $\text{Co}_3\text{O}_4$  phases, the half-width parameters in accordance with the Pseudo-Voigt function, the coordinates of oxygen atoms for the main phase. We used the FullProf Suite. The main result can be viewed in the List S1.

## List S1. Main results of XRD analysis by the Rietveld technique

We did not vary the marked (\*) values or parameters. But we specify them because the result may depend on them.

### Phase LiCoVO<sub>4</sub>

Atomic coordinates and occupancies

| Atom | x = y = z       | Biso(*) | Occ.(*) |
|------|-----------------|---------|---------|
| Li   | 0.500(*)        | 0.5     | 1       |
| Co1  | 0.500(*)        | 0.5     | 0.7     |
| Co2  | 0.125(*)        | 0.5     | 0.3     |
| V1   | 0.500(*)        | 0.5     | 0.3     |
| V2   | 0.125(*)        | 0.5     | 0.7     |
| O    | 0.2460 ± 0.0005 | 0.5     | 4       |

Cell parameter:  $a = (8.2772 \pm 0.0001) \text{ \AA}$

### Phase Co<sub>3</sub>O<sub>4</sub>

Cell parameter:  $a = (8.0868 \pm 0.0005) \text{ \AA}$

### Reliability-factors

$R_p$ : 1.22       $R_{wp}$ : 1.55       $R_{exp}$ : 1.64       $\chi^2$ : 0.89

### Weight fractions

LiCoVO<sub>4</sub> ( $87 \pm 1$ )%

Co<sub>3</sub>O<sub>4</sub> ( $13 \pm 1$ )%

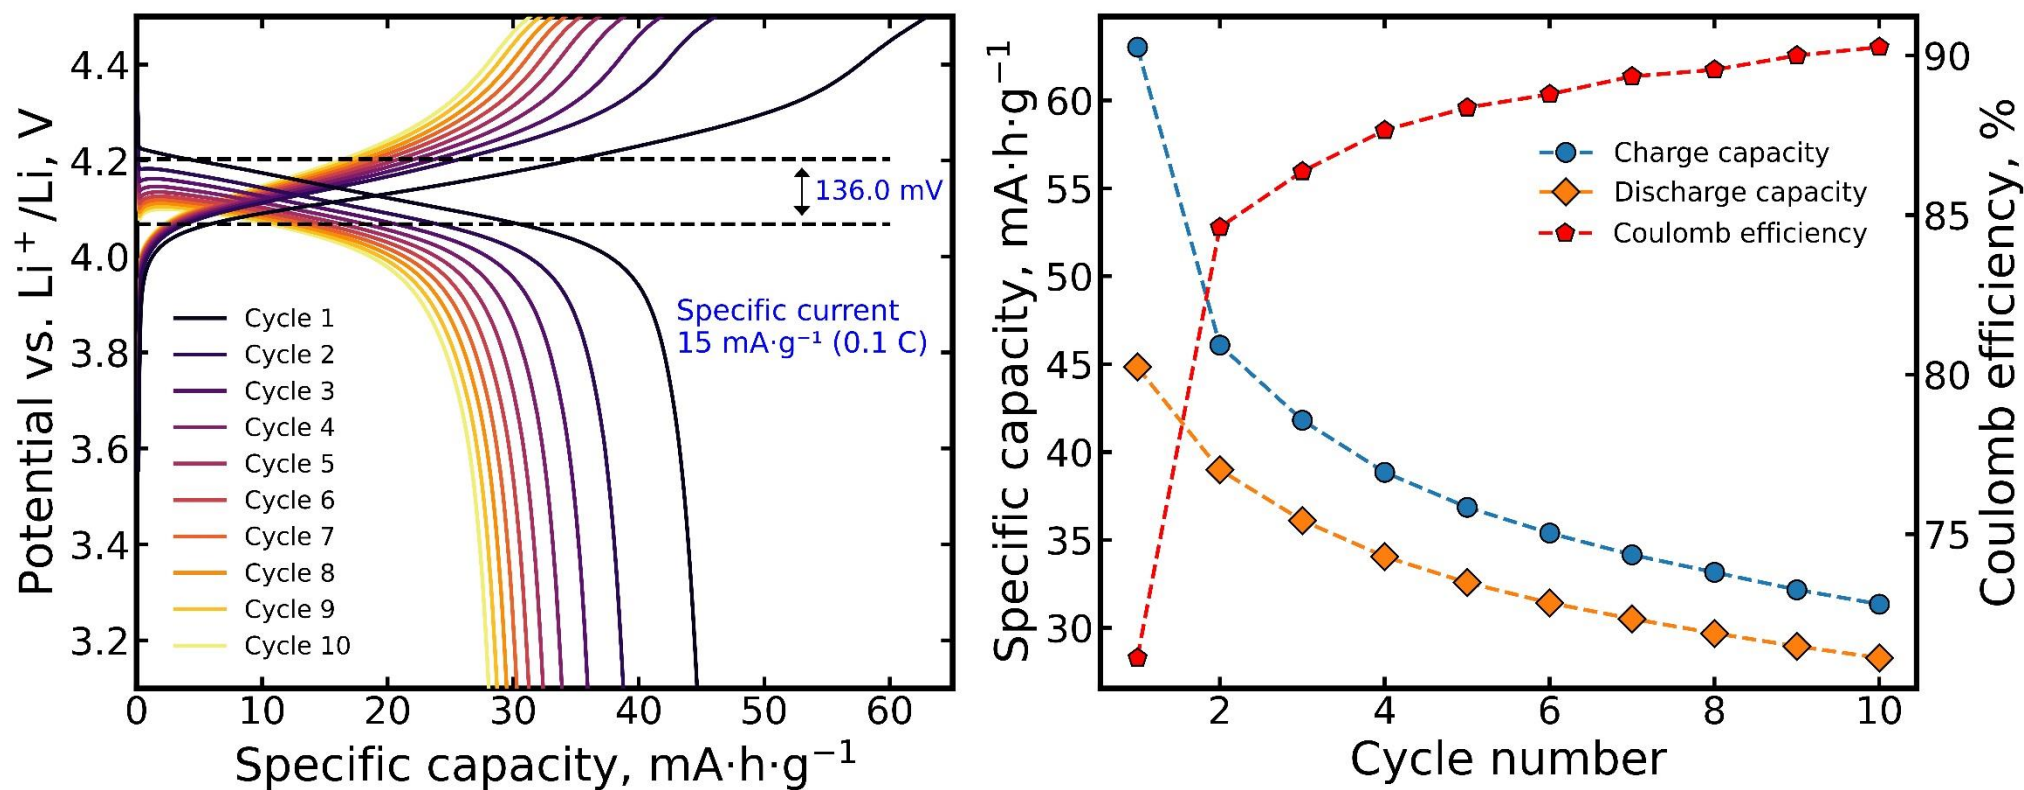

**Figure S2.** The curves of galvanostatic charge and discharge of the electrode based on  $\text{LiCoVO}_4$ , and the change in electrode capacitance and Coulomb efficiency during cycling at temperature of  $30^\circ\text{C}$ . The data from [9].

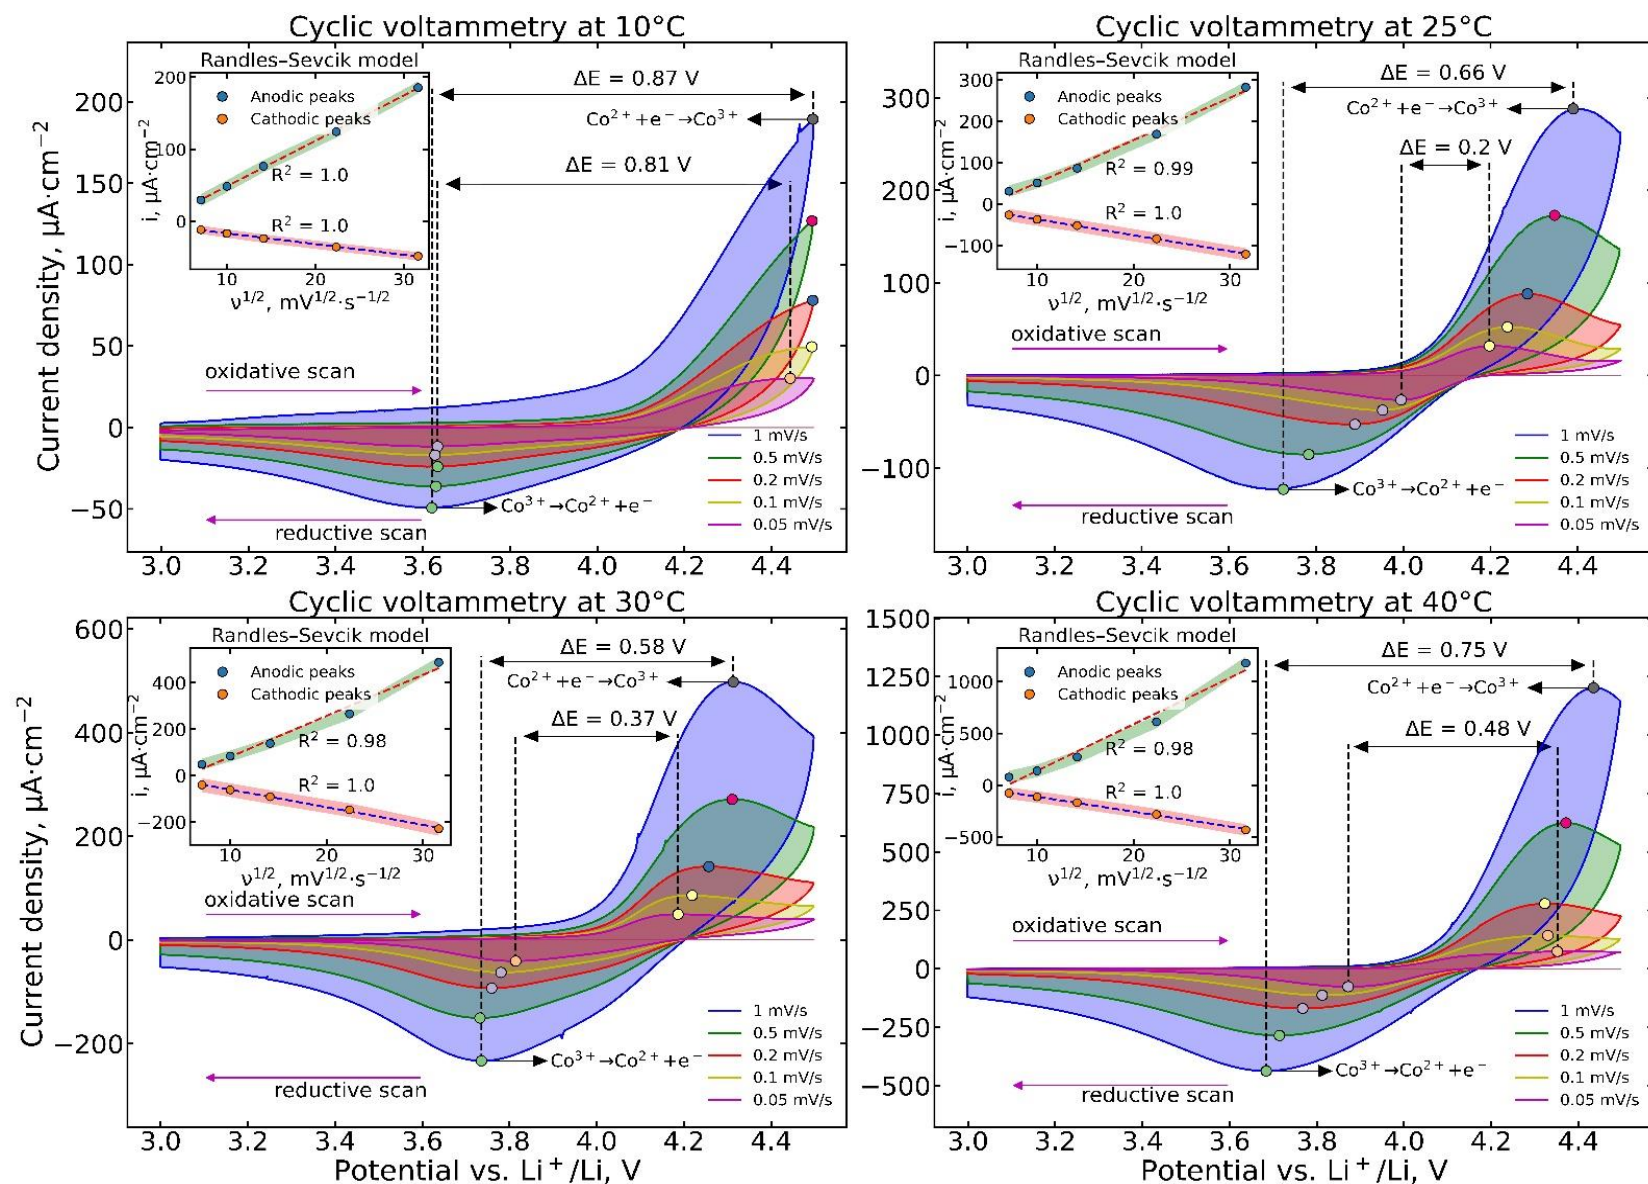

**Figure S3.** Cyclic voltammograms of  $\text{LiCoVO}_4$  taken at temperatures of 10, 25, 30 and 40°C in the potential range from 3.0 to 4.5 V. The polarization rate increased from 0.05 to 1  $\text{mV}\cdot\text{s}^{-1}$ . Inserts show the dependence of the peak current density on the potential sweep rate in linearized coordinates.

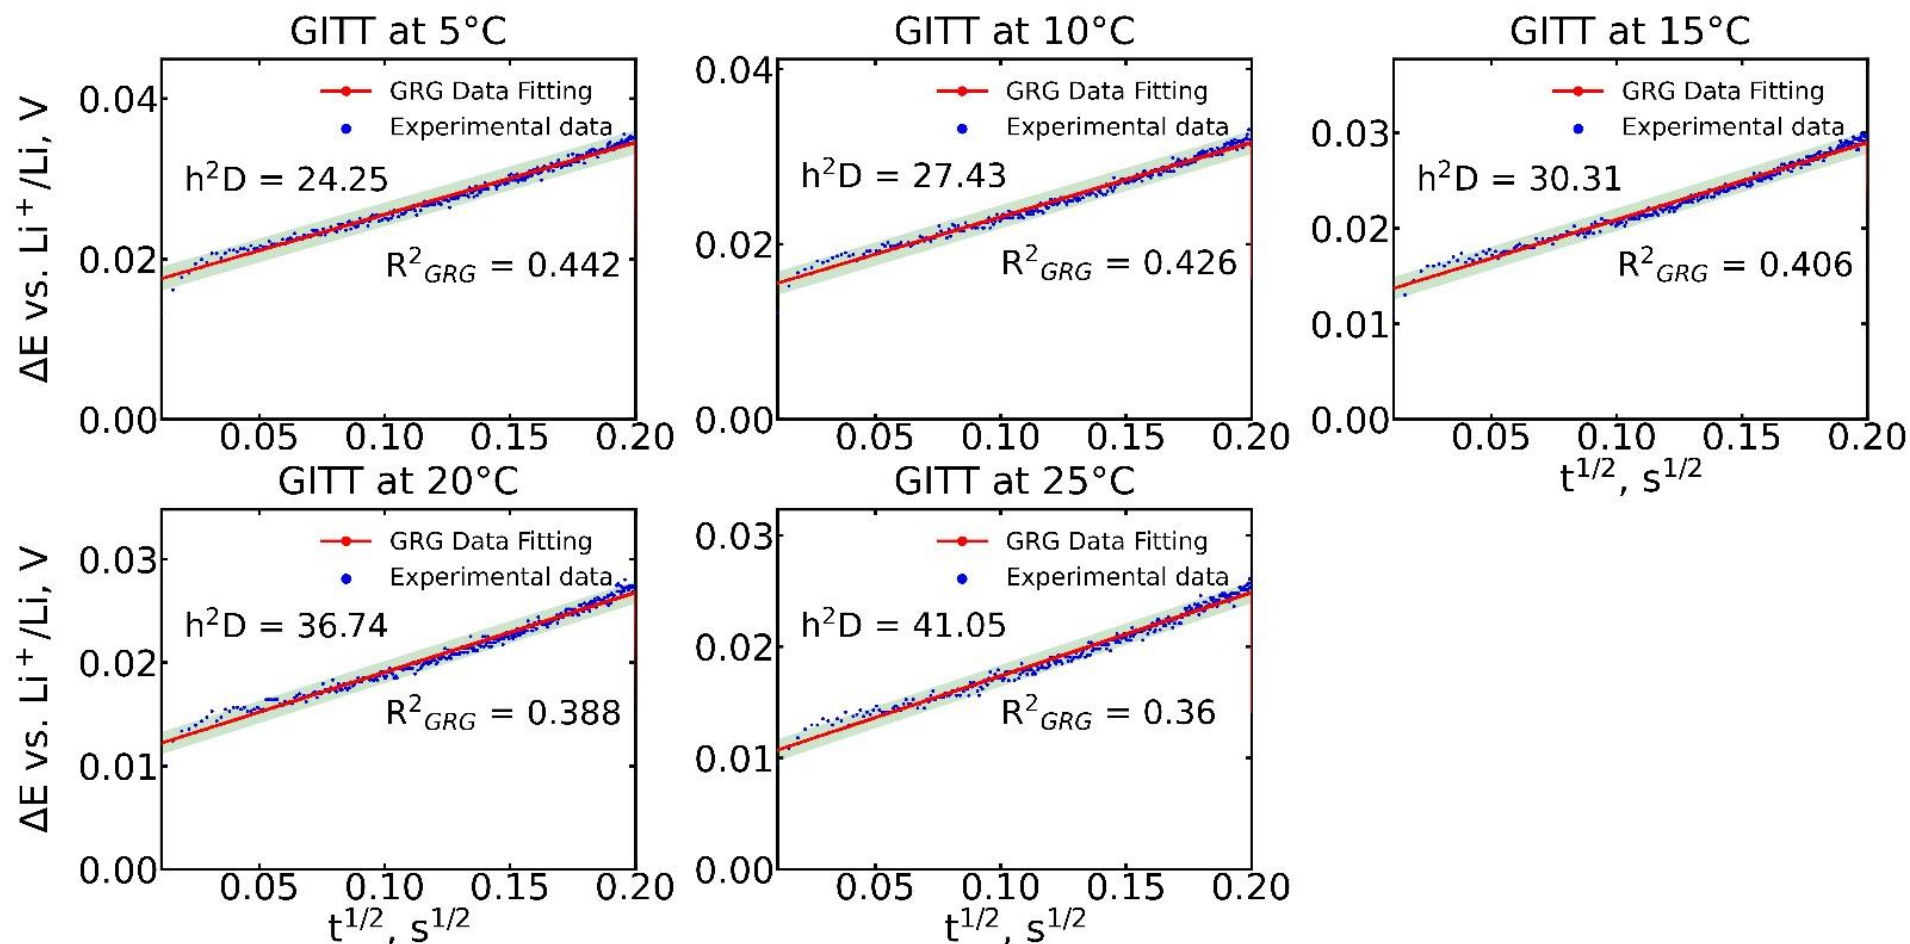

**Figure S4.** Fitting a linear regression of the potential transient to the square root of time during the current pulse; Blue markers - experimental data; red markers are the results of simulation based on equation 5. The magnitude of the pulsed current is 500  $\mu\text{A}$ . The duration of the pulse and relaxation is 40 ms. Temperature range from 5 to 25°C in steps of 5°C.

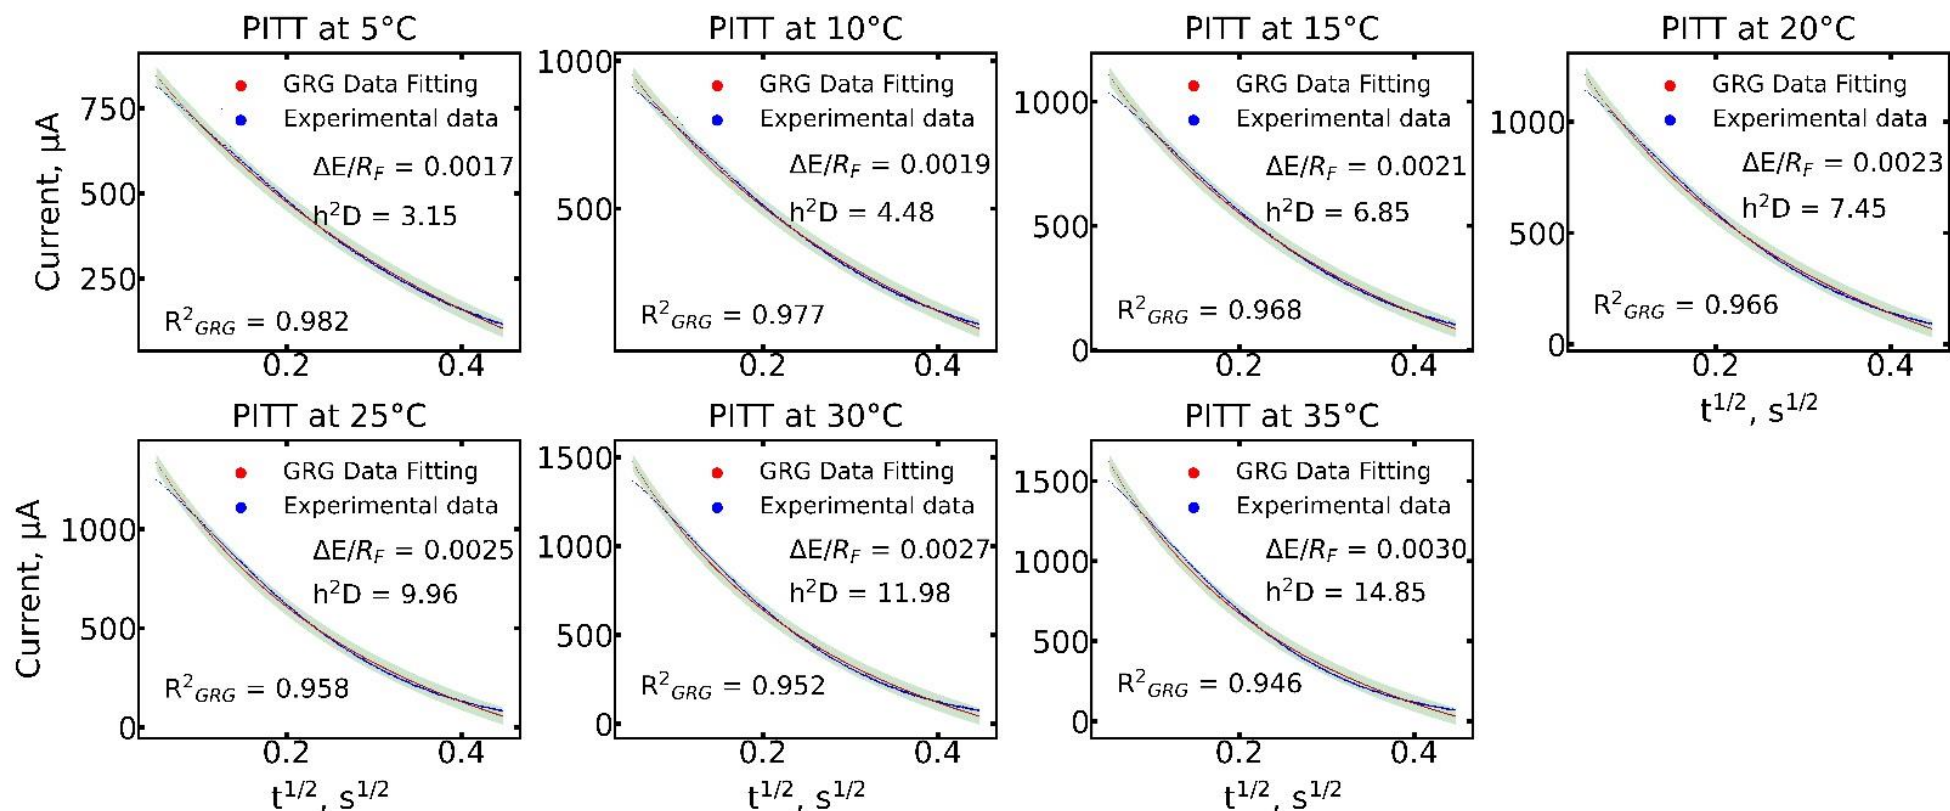

**Figure S5.** Current transients during potentiostatic impulse. Blue markers - experimental data; red markers are the results of simulation based on equation 6. The value of the potential pulse is 40 mV. The pulse duration is 200 ms. Temperature range from 5 to 35°C in steps of 5°C.
